# Supplementary material for: Trust in Acquaintances, Strangers and Institutions among Individuals of Different Socioeconomic Statuses during Public Health Emergencies: The Moderation of Family Structure and Policy Perception
Source: MDPI journal article supplement (doi:10.3390/bs14050404), 2024-05-13
Supplement: s1 [file s1]

## Supplementary Materials

In general, the results of multinomial regression are largely consistent with those of OLS regressions. The only exceptions were the moderating coefficients of epidemic prevention policy perception between education and trust in acquaintance and stranger, and between working in social organization and trust in institution. These coefficients lost significance. However, these results do not alter the main findings and conclusions of the present study. In other words, the multinomial regression analyses yielded consistent results with OLS regression analyses, and in the present study, the results remain robustness regardless of whether the Likert-type dependent variables were treated as continuous or ordinal.

Table S1: Multinomial regression of acquaintance trust

| Acquaintance trust              |           |        |           |        |           |        |           |        |
|---------------------------------|-----------|--------|-----------|--------|-----------|--------|-----------|--------|
| Trust level                     | 1         |        | 2         |        | 3         |        | 4         |        |
|                                 | B         | Exp(B) | B         | Exp(B) | B         | Exp(B) | B         | Exp(B) |
| Gender (female=0)               | 0.440**   | 1.553  | 0.301*    | 1.351  | 0.175*    | 1.192  | 0.156     | 1.169  |
| Age                             | -0.253**  | 0.776  | -0.077    | 0.926  | -0.025    | 0.975  | 0.037     | 1.038  |
| Place of residence (rural=0)    | 0.084     | 1.088  | -0.149    | 0.861  | -0.025    | 0.975  | 0.044     | 1.045  |
| Political affiliation           | -0.098    | 0.906  | 0.099     | 1.104  | -0.253**  | 0.777  | -0.212*   | 0.809  |
| Education                       | -0.037    | 0.964  | -0.024    | 0.977  | 0.030*    | 1.031  | 0.038**   | 1.039  |
| Income (lower=0)                | 0.086     | 1.090  | -0.094    | 0.910  | -0.014    | 0.986  | 0.079     | 1.082  |
| Occupation (public sector unit) |           |        |           |        |           |        |           |        |
| Private enterprise              | -0.198    | 0.820  | 0.212     | 1.236  | 0.342***  | 1.408  | 0.128     | 1.137  |
| Social organization             | -0.403    | 0.669  | -0.200    | 0.819  | -0.155    | 0.856  | -0.102    | 0.903  |
| Others                          | -0.164    | 1.179  | 0.474     | 1.607  | 0.508**   | 1.662  | 0.222     | 1.249  |
| Marital status (not married=0)  | -0.201    | 0.818  | 0.020     | 1.020  | -0.209*   | 0.811  | 0.212*    | 1.236  |
| Family size                     | -0.034    | 0.966  | -0.056    | 0.946  | -0.089*** | 0.915  | -0.057*   | 0.945  |
| Policy perception               | -0.572*** | 0.564  | -0.445*** | 0.641  | -0.256*** | 0.774  | -0.165*** | 0.848  |
| Intercept                       | 1.870***  |        | 1.101**   |        | 1.800***  |        | 0.490     |        |

Table S2: Multinomial regression of stranger trust

| Stranger trust                  |           |        |           |        |           |        |           |        |
|---------------------------------|-----------|--------|-----------|--------|-----------|--------|-----------|--------|
| Trust level                     | 1         |        | 2         |        | 3         |        | 4         |        |
|                                 | B         | Exp(B) | B         | Exp(B) | B         | Exp(B) | B         | Exp(B) |
| Gender (female=0)               | 0.534*    | 1.705  | 0.255     | 1.290  | 0.138     | 1.148  | 0.198     | 1.219  |
| Age                             | 0.057     | 1.059  | 0.124     | 1.132  | 0.122     | 1.130  | 0.060     | 1.062  |
| Place of residence (rural=0)    | 0.262     | 1.300  | 0.298     | 1.347  | 0.097     | 1.101  | 0.196     | 1.216  |
| Political affiliation           | 0.055     | 1.056  | 0.023     | 1.023  | 0.063     | 1.065  | 0.064     | 1.067  |
| Education                       | -0.024    | 0.977  | 0.025     | 1.025  | 0.031     | 1.031  | 0.009     | 1.009  |
| Income (lower=0)                | 0.345     | 1.412  | 0.091     | 1.095  | 0.122     | 1.129  | 0.064     | 1.066  |
| Occupation (public sector unit) |           |        |           |        |           |        |           |        |
| Private enterprise              | 0.084     | 1.088  | -0.748*   | 0.473  | -0.213    | 0.809  | -0.258    | 0.773  |
| Social organization             | -0.586    | 0.556  | 0.906**   | 2.475  | 1.018***  | 2.767  | 0.713*    | 2.041  |
| Others                          | 0.825*    | 2.281  | 0.145     | 1.156  | 0.444**   | 1.558  | 0.160     | 1.173  |
| Marital status (not married=0)  | 0.003     | 1.003  | -0.057    | 0.945  | -0.313*   | 0.731  | 0.175     | 1.192  |
| Family size                     | -0.117    | 0.889  | -0.148**  | 0.862  | -0.113**  | 0.893  | -0.043    | 0.958  |
| Policy perception               | -0.945*** | 0.389  | -0.652*** | 0.521  | -0.607*** | 0.545  | -0.579*** | 0.560  |
| Intercept                       | 3.065***  |        | 1.628*    |        | 3.003***  |        | 2.197***  |        |

Table S3: Multinomial regression of institution trust

| Institution trust               |           |        |           |        |           |        |          |        |
|---------------------------------|-----------|--------|-----------|--------|-----------|--------|----------|--------|
| Trust level                     | 1         |        | 2         |        | 3         |        | 4        |        |
|                                 | B         | Exp(B) | B         | Exp(B) | B         | Exp(B) | B        | Exp(B) |
| Gender (female=0)               | -0.258    | 0.773  | 0.891*    | 2.438  | 0.358*    | 1.430  | -0.029   | 0.972  |
| Age                             | -0.451    | 0.637  | -0.645**  | 0.525  | -0.250**  | 0.779  | -0.110   | 0.896  |
| Place of residence (rural=0)    | 0.381     | 1.464  | 0.846     | 2.331  | -0.054    | 0.947  | -0.288   | 0.750  |
| Political affiliation           | -0.322    | 0.725  | -0.112    | 0.894  | 0.065     | 1.067  | 0.005    | 1.005  |
| Education                       | -0.086**  | 0.917  | -0.031    | 0.970  | -0.038    | 0.963  | -0.022   | 0.979  |
| Income (lower=0)                | -1.032    | 0.356  | 0.378     | 1.460  | -0.051    | 0.951  | -0.239   | 0.788  |
| Occupation (public sector unit) |           |        |           |        |           |        |          |        |
| Private enterprise              | -0.329    | 0.720  | 0.318     | 1.374  | 0.312     | 1.367  | 0.037    | 1.038  |
| Social organization             | 0.342     | 1.408  | -0.433    | 0.649  | 0.595*    | 1.814  | 0.215    | 1.239  |
| Others                          | -0.142    | 0.868  | 0.639     | 1.895  | 0.172     | 1.188  | -0.294   | 0.746  |
| Marital status (not married=0)  | 1.260*    | 3.526  | 0.944*    | 2.571  | -0.279    | 0.757  | 0.100    | 1.105  |
| Family size                     | -0.283    | 0.753  | -0.115    | 0.892  | -0.152**  | 0.859  | -0.113*  | 0.893  |
| Policy perception               | -1.240*** | 0.290  | -1.646*** | 0.193  | -1.378*** | 0.252  | -        | 0.327  |
|                                 |           |        |           |        |           |        | 1.119*** |        |
| Intercept                       | 4.655***  |        | 4.961***  |        | 6.877***  |        | 5.592*** |        |

Table S4-1: Multinomial regression results of moderating effects for acquaintance trust

| Acquaintance trust-1              |           |        |           |        |          |        |         |        |
|-----------------------------------|-----------|--------|-----------|--------|----------|--------|---------|--------|
| Trust level                       | 1         |        | 2         |        | 3        |        | 4       |        |
|                                   | B         | Exp(B) | B         | Exp(B) | B        | Exp(B) | B       | Exp(B) |
| Gender (female=0)                 | 0.484**   | 1.622  | 0.335*    | 1.398  | 0.195*   | 1.215  | 0.168*  | 1.182  |
| Age                               | -0.354*** | 0.702  | -0.141    | 0.869  | -0.056   | 0.946  | 0.022   | 1.023  |
| Place of residence (rural=0)      | 0.142     | 1.153  | -0.113    | 0.893  | -0.009   | 0.991  | 0.051   | 1.052  |
| Political affiliation             | -0.026    | 0.974  | 0.155     | 1.168  | -0.235** | 0.791  | -0.211* | 0.810  |
| Education                         | -0.126*** | 0.882  | -0.087*** | 0.917  | -0.016   | 0.984  | -0.013  | 0.987  |
| Income (lower=0)                  | 0.299     | 1.348  | -0.020    | 0.980  | 0.104    | 1.110  | 0.061   | 1.063  |
| Occupation (public sector unit)   |           |        |           |        |          |        |         |        |
| Private enterprise                | -0.166    | 0.847  | 0.315     | 1.370  | 0.555*** | 1.742  | 0.419** | 1.520  |
| Social organization               | -0.566    | 0.568  | -0.584    | 0.558  | -0.157   | 0.854  | -0.072  | 0.930  |
| Others                            | -0.153    | 0.858  | 0.378     | 1.459  | 0.520*   | 1.682  | 0.321   | 1.378  |
| Marital status (not married=0)    |           |        |           |        |          |        |         |        |
| In a marriage×education           | 0.122**   | 1.130  | 0.071*    | 1.074  | 0.061**  | 1.063  | 0.077** | 1.080  |
| In a marriage×income              | -2.363*** | 0.290  | -1.170    | 0.310  | -1.171** | 0.310  | -0.759  | 0.496  |
| In a marriage×private enterprise  | -0.094    | 0.911  | -0.237    | 0.789  | -0.386*  | 0.680  | -0.467* | 0.627  |
| In a marriage×social organization | 0.466     | 1.593  | 0.686     | 1.985  | 0.039    | 1.039  | -0.003  | 0.997  |
| In a marriage×others              | 0.596     | 1.815  | 0.065     | 1.067  | -0.036   | 0.965  | -0.177  | 0.838  |
| Intercept                         | 0.727     |        | 0.009     |        | 0.982*** |        | 0.212   |        |

Table S4-2: Multinomial regression results of moderating effects for acquaintance trust

| Acquaintance trust-2            |           |        |        |        |          |        |         |        |
|---------------------------------|-----------|--------|--------|--------|----------|--------|---------|--------|
| Trust level                     | 1         |        | 2      |        | 3        |        | 4       |        |
|                                 | B         | Exp(B) | B      | Exp(B) | B        | Exp(B) | B       | Exp(B) |
| Gender (female=0)               | 0.486**   | 1.626  | 0.321* | 1.379  | 0.197*   | 1.218  | 0.145   | 1.156  |
| Age                             | -0.369*** | 0.691  | -0.136 | 0.873  | -0.092*  | 0.913  | 0.054   | 1.056  |
| Place of residence (rural=0)    | 0.142     | 1.152  | -0.104 | 0.901  | -0.020   | 0.980  | 0.062   | 1.064  |
| Political affiliation           | 0.009     | 1.009  | 0.174  | 1.190  | -0.233** | 0.792  | -0.185* | 0.832  |
| Education                       | -0.047    | 0.954  | -0.044 | 0.957  | -0.002   | 0.998  | 0.020   | 1.020  |
| Income (lower=0)                | -0.570    | 0.566  | -0.142 | 0.868  | 0.109    | 1.116  | 0.056   | 1.058  |
| Occupation (public sector unit) |           |        |        |        |          |        |         |        |
| Private enterprise              | 0.144     | 1.155  | 0.540  | 1.716  | 0.663**  | 1.941  | 0.493*  | 1.637  |
| Social organization             | -0.805    | 0.447  | 0.160  | 1.173  | 0.221    | 1.248  | 0.345   | 1.412  |
| Others                          | -0.041    | 0.959  | 0.204  | 1.226  | 0.265    | 1.304  | -0.172  | 0.842  |
| Family size                     |           |        |        |        |          |        |         |        |
| Family size×education           | 0.127     | 1.135  | -0.002 | 0.992  | 0.006    | 0.842  | 0.003   | 0.953  |
| Family size×income              | -0.002    | 0.998  | -0.008 | 1.007  | -0.172   | 0.884  | -0.048  | 0.954  |
| Family size×private enterprise  | -0.108    | 0.898  | -0.101 | 0.904  | -0.088   | 0.915  | -0.100  | 0.905  |
| Family size×social organization | 0.121     | 1.129  | -0.079 | 0.924  | -0.091   | 0.913  | -0.112  | 0.894  |
| Family size×others              | 0.023     | 1.023  | 0.049  | 1.050  | 0.065    | 1.068  | 0.094   | 1.098  |
| Intercept                       | 0.067     |        | -0.464 |        | 1.046**  |        | -0.064  |        |

Table S4-3: Multinomial regression results of moderating effects for acquaintance trust

| Acquaintance trust-3                  |          |        |           |        |           |        |         |        |
|---------------------------------------|----------|--------|-----------|--------|-----------|--------|---------|--------|
| Trust level                           | 1        |        | 2         |        | 3         |        | 4       |        |
|                                       | B        | Exp(B) | B         | Exp(B) | B         | Exp(B) | B       | Exp(B) |
| Gender (female=0)                     | 0.454**  | 1.575  | 0.304*    | 1.355  | 0.194*    | 1.214  | 0.146   | 1.157  |
| Age                                   | -0.290** | 0.748  | -0.073    | 0.929  | -0.064    | 0.938  | 0.072   | 1.074  |
| Place of residence (rural=0)          | 0.068    | 1.071  | -0.131    | 0.877  | -0.018    | 0.982  | 0.063   | 1.065  |
| Political affiliation                 | -0.099   | 0.906  | 0.093     | 1.097  | -0.264**  | 0.768  | -0.202* | 0.817  |
| Education                             | -0.039   | 0.962  | -0.023    | 0.977  | 0.044     | 1.045  | 0.057   | 1.059  |
| Income (lower=0)                      | 1.000    | 2.718  | 1.050     | 2.857  | 0.343     | 1.409  | 0.291   | 1.338  |
| Occupation (public sector unit)       |          |        |           |        |           |        |         |        |
| Private enterprise                    | 1.663**  | 5.274  | 2.128***  | 0.839  | 2.059***  | 7.839  | 0.773   | 2.167  |
| Social organization                   | -0.336   | 0.715  | -0.606    | 0.546  | 0.048     | 1.049  | -0.545  | 0.580  |
| Others                                | 0.711    | 2.037  | -0.338    | 0.713  | 0.029     | 1.029  | -0.315  | 0.730  |
| Policy perception                     |          |        |           |        |           |        |         |        |
| Policy perception×education           | 0.001    | 1.000  | -0.001    | 0.999  | -0.004    | 0.852  | -0.005  | 0.871  |
| Policy perception×income              | -0.615** | 0.541  | -0.556*   | 0.573  | -0.161    | 0.927  | -0.138  | 0.912  |
| Policy perception×private enterprise  | -0.451** | 0.637  | -0.457*** | 0.633  | -0.395*** | 0.674  | -0.142  | 0.867  |
| Policy perception×social organization | -0.023   | 0.977  | 0.106     | 1.112  | -0.055    | 0.947  | 0.105   | 1.111  |
| Policy perception×others              | -0.169   | 0.844  | 0.187     | 1.205  | 0.115     | 1.121  | 0.117   | 1.125  |
| Intercept                             | 1.053    |        | 0.242     |        | 0.749     |        | 0.021   |        |

Table S5-1: Multinomial regression results of moderating effects for stranger trust

| Stranger trust-1                  |           |        |          |        |         |        |        |        |
|-----------------------------------|-----------|--------|----------|--------|---------|--------|--------|--------|
| Trust level                       | 1         |        | 2        |        | 3       |        | 4      |        |
|                                   | B         | Exp(B) | B        | Exp(B) | B       | Exp(B) | B      | Exp(B) |
| Gender (female=0)                 | 0.586**   | 1.797  | 0.430*   | 1.538  | 0.165   | 1.180  | 0.130  | 1.139  |
| Age                               | -0.093    | 0.911  | 0.344**  | 1.411  | 0.052   | 1.153  | 0.010  | 1.010  |
| Place of residence (rural=0)      | 0.297     | 1.345  | 0.193    | 1.213  | 0.104   | 1.104  | 0.104  | 1.109  |
| Political affiliation             | 0.152     | 1.164  | -0.080   | 0.923  | 0.104   | 1.109  | 0.158  | 1.171  |
| Education                         | -0.158*** | 0.854  | -0.010   | 0.990  | -0.043  | 0.958  | -0.004 | 0.996  |
| Income (lower=0)                  | 0.463     | 1.590  | 0.284    | 1.329  | 0.299   | 1.349  | 0.043  | 1.044  |
| Occupation (public sector unit)   |           |        |          |        |         |        |        |        |
| Private enterprise                | -0.490    | 0.613  | 0.072    | 1.075  | 0.276   | 1.318  | 0.283  | 1.326  |
| Social organization               | 0.504     | 1.655  | 1.598*** | 4.945  | 1.063** | 2.896  | 0.065  | 1.067  |
| Others                            | -0.096    | 0.908  | 0.090    | 0.900  | 0.752*  | 2.122  | -0.050 | 0.952  |
| Marital status (not married=0)    |           |        |          |        |         |        |        |        |
| In a marriage×education           | 0.173**   | 1.189  | 0.102    | 1.107  | 0.081*  | 1.084  | 0.059  | 1.061  |
| In a marriage×income              | -2.857**  | 0.057  | -1.610   | 0.392  | -1.530* | 0.217  | -0.933 | 0.393  |
| In a marriage×private enterprise  | 0.183     | 1.201  | -0.551   | 0.577  | -0.597* | 0.550  | -0.115 | 0.892  |
| In a marriage×social organization | 0.059     | 1.061  | -0.649   | 0.522  | -0.742  | 0.476  | 0.075  | 1.078  |
| In a marriage×others              | 0.345     | 1.413  | -1.98    | 0.333  | -0.178  | 0.837  | 0.462  | 1.587  |
| Intercept                         | 0.798     |        | 2.216**  |        | 0.920*  |        | 0.155  |        |

Table S5-2: Multinomial regression results of moderating effects for stranger trust

| Stranger trust-2                |         |        |        |        |        |        |        |        |
|---------------------------------|---------|--------|--------|--------|--------|--------|--------|--------|
| Trust level                     | 1       |        | 2      |        | 3      |        | 4      |        |
|                                 | B       | Exp(B) | B      | Exp(B) | B      | Exp(B) | B      | Exp(B) |
| Gender (female=0)               | 0.589** | 1.803  | 0.170  | 1.186  | 0.167  | 1.182  | -0.150 | 0.861  |
| Age                             | -0.076  | 0.927  | 0.130  | 1.138  | 0.002  | 1.002  | 0.216* | 1.242  |
| Place of residence (rural=0)    | 0.308   | 1.361  | 0.174  | 1.190  | 0.073  | 1.076  | 0.284  | 1.328  |
| Political affiliation           | 0.216   | 1.242  | 0.241  | 1.272  | 0.102  | 1.107  | 0.127  | 1.135  |
| Education                       | -0.078  | 0.925  | 0.036  | 1.037  | -0.059 | 0.943  | 0.010  | 1.010  |
| Income (lower=0)                | 0.767   | 2.153  | 0.128  | 1.136  | 0.039  | 1.039  | 0.706  | 2.025  |
| Occupation (public sector unit) |         |        |        |        |        |        |        |        |
| Private enterprise              | 0.003   | 1.003  | 0.310  | 1.363  | 0.983* | 2.674  | 0.664  | 1.943  |
| Social organization             | -0.251  | 0.778  | -0.698 | 0.498  | 0.657  | 1.930  | 0.771  | 2.161  |
| Others                          | -0.726  | 0.484  | -1.720 | 0.179  | 0.383  | 1.467  | -0.019 | 0.981  |
| Family size                     |         |        |        |        |        |        |        |        |
| Family size×education           | 0.001   | 0.999  | -0.014 | 0.986  | 0.018  | 1.019  | 0.003  | 1.003  |
| Family size×income              | -0.274  | 0.760  | 0.039  | 0.975  | -0.311 | 0.733  | -0.049 | 0.952  |
| Family size×private enterprise  | 0.006   | 1.006  | 0.025  | 1.026  | -0.150 | 0.861  | -0.108 | 0.897  |
| Family size×social organization | -0.042  | 0.959  | 0.053  | 1.054  | -0.205 | 0.815  | -0.143 | 0.867  |
| Family size×others              | 0.371   | 1.449  | 0.503  | 1.654  | 0.170  | 1.185  | 0.200  | 1.222  |
| Intercept                       | 0.091   |        | 1.120  |        | 1.487* |        | 2.176* |        |

Table S5-3: Multinomial regression results of moderating effects for stranger trust

| Stranger trust-3                      |        |        |          |        |        |        |        |        |
|---------------------------------------|--------|--------|----------|--------|--------|--------|--------|--------|
| Trust level                           | 1      |        | 2        |        | 3      |        | 4      |        |
|                                       | B      | Exp(B) | B        | Exp(B) | B      | Exp(B) | B      | Exp(B) |
| Gender (female=0)                     | 0.544* | 1.722  | 0.432*   | 1.540  | 0.036  | 1.037  | -0.160 | 0.853  |
| Age                                   | 0.052  | 1.054  | 0.390*** | 1.477  | 0.172* | 1.188  | 0.247* | 1.280  |
| Place of residence (rural=0)          | 0.274  | 1.316  | 0.216    | 1.242  | 0.133  | 1.142  | 0.287  | 1.333  |
| Political affiliation                 | 0.060  | 1.062  | -0.109   | 0.897  | -0.020 | 0.980  | 0.101  | 1.107  |
| Education                             | 0.030  | 1.031  | 0.102    | 1.108  | 0.055  | 1.057  | 0.098  | 1.103  |
| Income (lower=0)                      | 0.115  | 1.122  | -2.526   | 0.080  | -0.246 | 0.782  | 0.507  | 1.661  |
| Occupation (public sector unit)       |        |        |          |        |        |        |        |        |
| Private enterprise                    | -1.225 | 0.294  | -0.921   | 0.398  | -0.192 | 0.825  | -1.570 | 0.208  |
| Social organization                   | 6.426* | 61.716 | 6.213    | 49.176 | 6.065* | 43.488 | 5.027  | 15.526 |
| Others                                | 0.501  | 1.651  | 2.035    | 7.651  | 0.879  | 2.409  | -1.150 | 0.317  |
| Policy perception                     |        |        |          |        |        |        |        |        |
| Policy perception×education           | -0.012 | 0.988  | -0.007   | 0.993  | -0.006 | 0.994  | -0.014 | 0.987  |
| Policy perception×income              | -0.722 | 0.386  | 0.134    | 1.143  | -0.333 | 0.716  | -0.379 | 0.685  |
| Policy perception×private enterprise  | -0.083 | 0.920  | -0.325   | 0.723  | -0.117 | 0.889  | 0.327  | 1.386  |
| Policy perception×social organization | 0.215  | 1.239  | 0.137    | 1.147  | -0.049 | 0.952  | 0.407  | 1.502  |
| Policy perception×others              | -1.179 | 0.308  | -1.052   | 0.349  | -1.113 | 0.329  | -0.883 | 0.413  |
| Intercept                             | 1.741  |        | 1.432    |        | 1.342  |        | 0.810  |        |

Table S6-1: Multinomial regression results of moderating effects for institution trust

| Institution trust-1               |           |        |          |        |        |        |         |        |
|-----------------------------------|-----------|--------|----------|--------|--------|--------|---------|--------|
| Trust level                       | 1         |        | 2        |        | 3      |        | 4       |        |
|                                   | B         | Exp(B) | B        | Exp(B) | B      | Exp(B) | B       | Exp(B) |
| Gender (female=0)                 | 0.356     | 1.427  | 0.720*   | 2.055  | 0.351* | 1.420  | -0.006  | 0.994  |
| Age                               | -0.435**  | 0.647  | -0.075   | 0.927  | 0.041  | 1.042  | 0.009   | 1.009  |
| Place of residence (rural=0)      | 0.315     | 1.371  | 0.672    | 1.959  | 0.103  | 1.109  | 0.226   | 1.254  |
| Political affiliation             | 0.408     | 1.504  | -0.185   | 0.831  | -0.103 | 0.902  | 0.390*  | 1.477  |
| Education                         | -0.160*** | 0.852  | 0.092    | 0.857  | 0.004  | 1.004  | 0.020   | 1.020  |
| Income (lower=0)                  | 0.012     | 1.012  | 0.019    | 1.020  | -0.054 | 0.948  | 0.410   | 1.507  |
| Occupation (public sector unit)   |           |        |          |        |        |        |         |        |
| Private enterprise                | -0.481    | 0.618  | 0.073    | 1.075  | 0.283  | 1.327  | -0.200  | 0.819  |
| Social organization               | -0.349    | 0.705  | 1.397    | 4.043  | 0.548  | 1.731  | -0.968  | 0.380  |
| Others                            | -0.388    | 0.678  | 0.832    | 2.299  | 0.417  | 1.518  | 0.332   | 1.394  |
| Marital status (not married=0)    |           |        |          |        |        |        |         |        |
| In a marriage×education           | 0.047     | 1.048  | -0.154   | 0.857  | 0.072* | 0.926  | -0.032  | 0.968  |
| In a marriage×income              | -1.545    | 0.213  | 2.739    | 15.473 | -0.191 | 0.826  | 0.459   | 1.583  |
| In a marriage×private enterprise  | 0.186     | 1.205  | -0.677   | 0.508  | -0.346 | 0.707  | -0.493  | 0.611  |
| In a marriage×social organization | 0.596     | 1.815  | -0.181   | 0.835  | -0.508 | 0.602  | -0.016  | 0.984  |
| In a marriage×others              | 1.352     | 3.865  | -0.856   | 0.425  | -0.456 | 0.634  | 0.471   | 1.602  |
| Intercept                         | 1.118     |        | 5.390*** |        | 1.365* |        | 2.234** |        |

Table S6-2: Multinomial regression results of moderating effects for institution trust

| Institution trust-2             |           |        |         |        |           |        |         |        |
|---------------------------------|-----------|--------|---------|--------|-----------|--------|---------|--------|
| Trust level                     | 1         | 2      | 3       | 4      |           |        |         |        |
|                                 | B         | Exp(B) | B       | Exp(B) | B         | Exp(B) | B       | Exp(B) |
| Gender (female=0)               | 0.368     | 1.445  | 0.404   | 1.498  | 0.378**   | 1.460  | -0.018  | 0.982  |
| Age                             | -0.467*** | 0.627  | -0.138  | 0.871  | -0.371*** | 0.690  | -0.128  | 0.880  |
| Place of residence (rural=0)    | 0.281     | 1.324  | -0.240  | 0.787  | -0.097    | 0.908  | -0.326* | 0.722  |
| Political affiliation           | 0.382     | 1.465  | 0.734** | 2.083  | 0.099     | 1.104  | 0.051   | 1.053  |
| Education                       | -0.183**  | 0.833  | -0.071  | 0.932  | -0.180*** | 0.836  | -0.095  | 0.909  |
| Income (lower=0)                | 0.151     | 1.163  | -0.599* | 0.202  | -0.543    | 0.581  | 0.451   | 1.570  |
| Occupation (public sector unit) |           |        |         |        |           |        |         |        |
| Private enterprise              | -0.316    | 0.729  | 0.622   | 1.863  | 0.586     | 1.797  | 0.429   | 1.536  |
| Social organization             | -0.701    | 0.496  | -1.434  | 0.238  | -0.014    | 0.986  | -0.241  | 0.786  |
| Others                          | -0.959    | 0.383  | -0.301  | 0.740  | 0.646     | 1.908  | -0.010  | 0.990  |
| Family size                     |           |        |         |        |           |        |         |        |
| Family size×education           | 0.010     | 1.010  | -0.003  | 0.997  | 0.035**   | 1.035  | 0.015   | 1.015  |
| Family size×income              | -0.503    | 0.682  | 0.204   | 1.227  | -0.584**  | 0.559  | -0.511* | 0.600  |
| Family size×private enterprise  | -0.020    | 0.980  | 0.069   | 1.071  | -0.095    | 0.909  | 0.011   | 1.012  |
| Family size×social organization | 0.193     | 1.213  | -0.149  | 0.861  | -0.076    | 0.927  | -0.171  | 0.843  |
| Family size×others              | 0.310     | 1.364  | 0.208   | 1.232  | 0.162     | 1.176  | 0.110   | 1.116  |
| Intercept                       | 2.225*    |        | 0.523   |        | 3.053***  |        | 1.547   |        |

Table S6-3: Multinomial regression results of moderating effects for institution trust

| Institution trust-3                   |          |        |          |        |         |        |        |        |
|---------------------------------------|----------|--------|----------|--------|---------|--------|--------|--------|
| Trust level                           | 1        | 2      | 3        | 4      |         |        |        |        |
|                                       | B        | Exp(B) | B        | Exp(B) | B       | Exp(B) | B      | Exp(B) |
| Gender (female=0)                     | 0.329    | 1.389  | 0.618*   | 1.855  | -0.009  | 0.991  | -0.035 | 0.965  |
| Age                                   | -0.355** | 0.701  | -0.428** | 0.652  | -0.246* | 0.782  | -0.090 | 0.914  |
| Place of residence (rural=0)          | 0.276    | 1.318  | 0.215    | 1.240  | -0.092  | 0.912  | -0.281 | 0.755  |
| Political affiliation                 | 0.263    | 1.301  | -0.089   | 0.915  | -0.097  | 0.907  | -0.007 | 0.993  |
| Education                             | 0.178    | 1.195  | 0.107    | 1.113  | 0.167   | 1.182  | 0.145  | 1.156  |
| Income (lower=0)                      | 0.289    | 1.336  | 0.791    | 2.205  | -0.825  | 0.438  | -0.595 | 0.552  |
| Occupation (public sector unit)       |          |        |          |        |         |        |        |        |
| Private enterprise                    | -1.359   | 0.257  | 0.832    | 2.298  | 0.185   | 1.203  | 1.094  | 2.987  |
| Social organization                   | 0.887    | 2.428  | 2.936    | 18.842 | 0.863   | 2.369  | -0.002 | 0.998  |
| Others                                | 0.374    | 1.453  | -0.717   | 0.488  | 0.615   | 1.850  | 0.302  | 1.353  |
| Policy perception                     |          |        |          |        |         |        |        |        |
| Policy perception×education           | -0.063** | 0.939  | -0.026   | 0.974  | -0.050* | 0.951  | -0.032 | 0.969  |
| Policy perception×income              | -0.912*  | 0.402  | -1.242*  | 0.289  | -0.591  | 0.554  | -0.579 | 0.560  |
| Policy perception×private enterprise  | -0.152   | 0.859  | 0.118    | 1.125  | -0.127  | 0.881  | -0.051 | 0.950  |
| Policy perception×social organization | 0.386    | 1.471  | -0.093   | 0.911  | 0.074   | 1.077  | -0.339 | 0.712  |
| Policy perception×others              | -0.075   | 0.928  | -0.834   | 0.434  | -0.159  | 0.853  | 0.069  | 1.071  |
| Intercept                             | 3.251*   |        | 2.495    |        | 3.126*  |        | 2.752  |        |
